# Supplementary material for: Transcriptomic Response of Nitrosomonas europaea Transitioned from Ammonia- to Oxygen-Limited Steady-State Growth
Source: PubMed Central journal article supplement (PMC6967387; doi:10.1128/msystems.00562-19), 2020-01-14

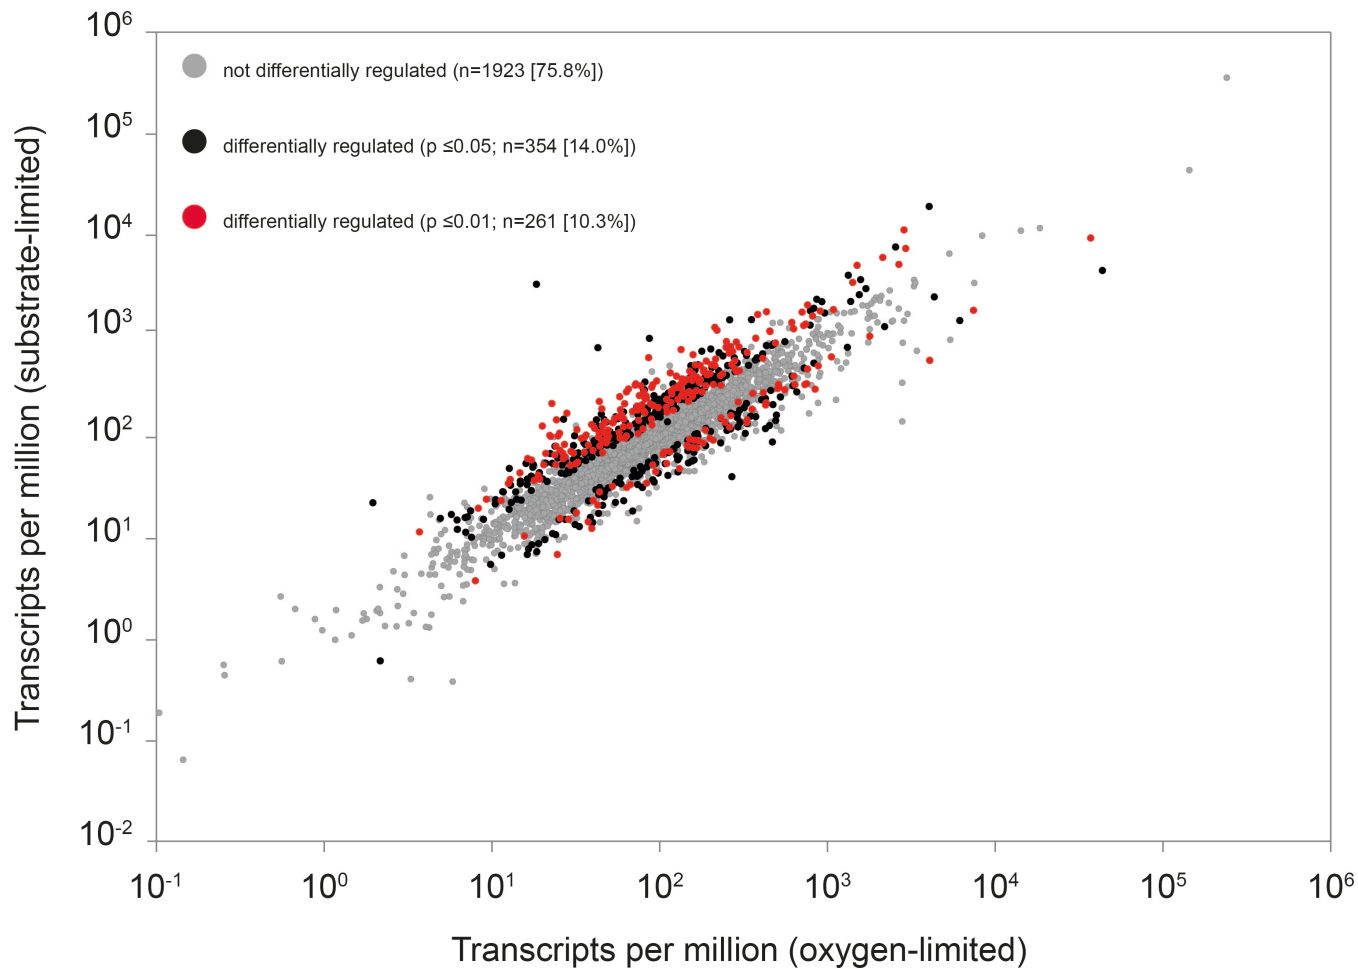

Supplement: mSystems.00562-19-sf001.pdf [file mSystems.00562-19-sf001.pdf]
