# Supplementary material for: Transcriptomic Response of Nitrosomonas europaea Transitioned from Ammonia- to Oxygen-Limited Steady-State Growth
Source: PubMed Central journal article supplement (PMC6967387; doi:10.1128/msystems.00562-19), 2020-01-14
Supplement: mSystems.00562-19-st001.pdf [file mSystems.00562-19-st001.pdf]

| Sampling [day] | NH <sub>4</sub> <sup>+</sup> [mmol L <sup>-1</sup> ] | NO <sub>2</sub> <sup>-</sup> [mmol L <sup>-1</sup> ] | N-balance [mmol L <sup>-1</sup> ] | OD600        | gDCW <sub>c</sub> [gDCW L <sup>-1</sup> ] | NH <sub>3</sub> consumed [mmol L <sup>-1</sup> ] | qNH <sub>3</sub> [mmol gDCW <sup>-1</sup> h <sup>-1</sup> ] | Y [gDCW mol <sup>-1</sup> ] |
|----------------|------------------------------------------------------|------------------------------------------------------|-----------------------------------|--------------|-------------------------------------------|--------------------------------------------------|-------------------------------------------------------------|-----------------------------|
| 0              | 60                                                   | 1.49                                                 | 61.49                             | 0.003        | 0.00050                                   | 0                                                |                                                             |                             |
| 1              | 57.7                                                 | 1.08                                                 | 58.78                             | 0.006        | 0.00099                                   | 2.3                                              |                                                             |                             |
| 2              | 55.14                                                | 5.68                                                 | 60.81                             | 0.002        | 0.00027                                   | 4.87                                             |                                                             |                             |
| 3              | 44.05                                                | 16.49                                                | 60.54                             | 0.038        | 0.00610                                   | 15.95                                            |                                                             |                             |
| 4              | 30.54                                                | 29.46                                                | 60                                | 0.074        | 0.01186                                   | 29.46                                            |                                                             |                             |
| 5              | 14.32                                                | 41.35                                                | 55.68                             | 0.118        | 0.01890                                   | 45.68                                            |                                                             |                             |
| 6              | 2.84                                                 | 59.32                                                | 62.16                             | 0.149        | 0.02381                                   | 57.16                                            |                                                             |                             |
| 7              | 2.03                                                 | 61.22                                                | 63.24                             | 0.160        | 0.02565                                   | 57.97                                            | 22.60                                                       | 0.44                        |
| 8              | 0.81                                                 | 60.81                                                | 61.62                             | 0.160        | 0.02560                                   | 59.19                                            | 23.12                                                       | 0.43                        |
| <b>9</b>       | <b>0.68</b>                                          | <b>59.32</b>                                         | <b>60</b>                         | <b>0.154</b> | <b>0.02459</b>                            | <b>59.32</b>                                     | <b>24.12</b>                                                | <b>0.41</b>                 |
| <b>10</b>      | <b>1.35</b>                                          | <b>60.41</b>                                         | <b>61.76</b>                      | <b>0.146</b> | <b>0.02336</b>                            | <b>58.65</b>                                     | <b>25.11</b>                                                | <b>0.40</b>                 |
| <b>11</b>      | <b>0.68</b>                                          | <b>57.57</b>                                         | <b>58.24</b>                      | <b>0.149</b> | <b>0.02376</b>                            | <b>59.32</b>                                     | <b>24.97</b>                                                | <b>0.40</b>                 |
| 12             | 0.41                                                 | 60.41                                                | 60.81                             | 0.156        | 0.02488                                   | 59.6                                             | 23.95                                                       | 0.42                        |
| 13             | 0.81                                                 | 60.68                                                | 61.49                             | 0.146        | 0.02331                                   | 59.19                                            | 25.39                                                       | 0.39                        |
| 14             | 0.81                                                 | 62.7                                                 | 63.51                             | 0.152        | 0.02426                                   | 59.19                                            | 24.40                                                       | 0.41                        |
| 15             | 0.68                                                 | 59.05                                                | 59.73                             | 0.160        | 0.02560                                   | 59.32                                            | 23.17                                                       | 0.43                        |
| 16             | 0.54                                                 | 58.78                                                | 59.32                             | 0.158        | 0.02522                                   | 59.46                                            | 23.58                                                       | 0.42                        |
| 17             | 7.03                                                 | 51.08                                                | 58.11                             | 0.135        | 0.02157                                   | 52.97                                            |                                                             |                             |
| 18             | 12.84                                                | 48.78                                                | 61.62                             | 0.114        | 0.01827                                   | 47.16                                            |                                                             |                             |
| 19             | 22.43                                                | 41.22                                                | 63.65                             | 0.097        | 0.01554                                   | 37.57                                            |                                                             |                             |
| 20             | 30.81                                                | 32.43                                                | 63.24                             | 0.087        | 0.01386                                   | 29.19                                            |                                                             |                             |
| 21             | 27.43                                                | 26.62                                                | 54.05                             | 0.089        | 0.01426                                   | 32.57                                            |                                                             |                             |
| 22             | 29.86                                                | 24.86                                                | 54.73                             | 0.086        | 0.01374                                   | 30.14                                            |                                                             |                             |
| 23             | 30.95                                                | 24.59                                                | 55.54                             | 0.082        | 0.01318                                   | 29.05                                            | 22.03                                                       | 0.45                        |
| 24             | 26.35                                                | 24.46                                                | 50.81                             | 0.087        | 0.01392                                   | 33.65                                            | 24.17                                                       | 0.41                        |
| 25             | 27.7                                                 | 22.84                                                | 50.54                             | 0.081        | 0.01291                                   | 32.3                                             | 25.02                                                       | 0.40                        |
| 26             | 28.24                                                | 24.19                                                | 52.43                             | 0.070        | 0.01123                                   | 31.76                                            | 28.28                                                       | 0.35                        |
| 27             | 29.19                                                | 24.32                                                | 53.51                             | 0.071        | 0.01130                                   | 30.81                                            | 27.28                                                       | 0.37                        |
| <b>28</b>      | <b>29.73</b>                                         | <b>25.54</b>                                         | <b>55.27</b>                      | <b>0.070</b> | <b>0.01112</b>                            | <b>30.27</b>                                     | <b>27.22</b>                                                | <b>0.37</b>                 |
| <b>29</b>      | <b>28.24</b>                                         | <b>24.59</b>                                         | <b>52.83</b>                      | <b>0.069</b> | <b>0.01096</b>                            | <b>31.76</b>                                     | <b>28.98</b>                                                | <b>0.35</b>                 |
| <b>30</b>      | <b>27.7</b>                                          | <b>22.84</b>                                         | <b>50.54</b>                      | <b>0.069</b> | <b>0.01101</b>                            | <b>32.3</b>                                      | <b>29.34</b>                                                | <b>0.34</b>                 |
| 31             | 30.14                                                | 23.43                                                | 53.57                             | 0.070        | 0.01126                                   | 29.86                                            | 26.51                                                       | 0.38                        |
| 32             | 30.57                                                | 23.86                                                | 53.43                             | 0.072        | 0.01152                                   | 29.43                                            | 25.55                                                       | 0.39                        |
