# Supplementary material for: Transcriptomic Response of Nitrosomonas europaea Transitioned from Ammonia- to Oxygen-Limited Steady-State Growth
Source: PubMed Central journal article supplement (PMC6967387; doi:10.1128/msystems.00562-19), 2020-01-14
Supplement: mSystems.00562-19-st002.pdf [file mSystems.00562-19-st002.pdf]

| Gene ID                    | Locus tag                | Annotation                                | Fold change | Rank abundance                  |                                |
|----------------------------|--------------------------|-------------------------------------------|-------------|---------------------------------|--------------------------------|
|                            |                          |                                           |             | NH <sub>3</sub> -limited growth | O <sub>2</sub> -limited growth |
| <b>Energy conservation</b> |                          |                                           |             |                                 |                                |
| <i>amoC</i>                | NE1411                   | Ammonia monooxygenase subunit C singleton | 1.9         | 229                             | 115                            |
| <i>amoC</i>                | NE0945 / 2064            | Ammonia monooxygenase subunit C           | -3.3        | 2                               | 2                              |
| <i>amoA</i>                | NE0944 / 2063            | Ammonia monooxygenase subunit A           | -1.6        | 5                               | 4                              |
| <i>amoB</i>                | NE0943 / 2062            | Ammonia monooxygenase subunit B           | -1.3        | 6                               | 6                              |
| <i>amoE</i>                | NE0942 / 2061            | Ammonia monooxygenase subunit E           | 1.0         | 66                              | 81                             |
| <i>amoD</i>                | NE0941 / NE2060          | Ammonia monooxygenase subunit D           | -1.2        | 42                              | 59                             |
|                            |                          |                                           |             |                                 |                                |
| <i>haoA</i>                | NE0962 / NE2044 / NE2339 | Hydroxylamine dehydrogenase subunit A     | 1.33        | 245                             | 183                            |
| <i>haoB</i>                | NE0961 / NE2043 / NE2338 | Hydroxylamine dehydrogenase subunit B     | 1.2         | 422                             | 387                            |
| <i>cycA</i>                | NE0960 / NE2042 / NE2337 | Cytochrome c-554                          | -1.07       | 91                              | 117                            |
| <i>cycX</i>                | NE0959 / NE2336          | Tetraheme cytochrome c-type cm552         | -1.03       | 75                              | 93                             |
|                            |                          |                                           |             |                                 |                                |
| <i>ncy</i>                 | NE0143                   | Nitrosocyanin                             | 1.7         | 36                              | 27                             |
| <i>cycB</i>                | NE0102                   | Cytochrome c-552                          | 1.3         | 100                             | 89                             |
| <i>cytL</i>                | NE0011                   | Cytochrome P460                           | -1.6        | 271                             | 522                            |
| <i>cytS</i>                | NE0824                   | Cytochrome c' beta                        | -2.3**      | 120                             | 360                            |

| Gene ID                                                | Locus tag | Annotation                                                | Fold change | Rank abundance                  |                                |
|--------------------------------------------------------|-----------|-----------------------------------------------------------|-------------|---------------------------------|--------------------------------|
|                                                        |           |                                                           |             | NH <sub>3</sub> -limited growth | O <sub>2</sub> -limited growth |
| <b>Carbon fixation and storage compound metabolism</b> |           |                                                           |             |                                 |                                |
| <i>cbbO</i>                                            | NE1918    | von Willebrand factor type A / RuBisCO activation protein | -19.71      | 25                              | 891                            |
| <i>cbbQ</i>                                            | NE1919    | RuBisCO activation protein                                | -8.18       | 26                              | 351                            |
| <i>cbbS</i>                                            | NE1920    | Ribulose biphosphate carboxylase small chain              | -9.89*      | 3                               | 16                             |
| <i>cbbL</i>                                            | NE1921    | Ribulose biphosphate carboxylase large chain              | -4.02**     | 4                               | 9                              |
| <i>cbbR</i>                                            | NE1922    | LysR transcription regulator                              | 4.50**      | 2086                            | 1173                           |
| <i>cbbA</i>                                            | NE0324    | Fructose-bisphosphate aldolase                            | 1.14        | 368                             | 348                            |
| <i>pykA1</i>                                           | NE0325    | Pyruvate kinase                                           | 1.18        | 862                             | 1048                           |
| <i>pgk</i>                                             | NE0326    | Phosphoglycerate kinase                                   | 1.63        | 207                             | 423                            |
| <i>cbbG</i>                                            | NE0327    | Glyceraldehyde-3-phosphate dehydrogenase                  | 1.06        | 266                             | 278                            |
| <i>cbbT</i>                                            | NE0328    | Transketolase                                             | 2.06*       | 610                             | 304                            |
| <i>cah</i>                                             | NE0606    | Carbonic anhydrase                                        | -1.20       | 652                             | 861                            |
| <i>cah</i>                                             | NE1926    | Carbonic anhydrase                                        | -1.43       | 310                             | 512                            |
| <i>ppk</i>                                             | NE0323    | Polyphosphate kinase                                      | 2.08**      | 1084                            | 607                            |
| <i>ppx</i>                                             | NE1745    | Exopolyphosphatase                                        | -1.05       | 1085                            | 1223                           |

| Gene ID                                        | Locus tag | Annotation                                  | Fold change | Rank abundance                  |                                |
|------------------------------------------------|-----------|---------------------------------------------|-------------|---------------------------------|--------------------------------|
|                                                |           |                                             |             | NH <sub>3</sub> -limited growth | O <sub>2</sub> -limited growth |
| <b>Universal and oxidative stress response</b> |           |                                             |             |                                 |                                |
| <i>cspD</i>                                    | NE1312    | Cold-shock protein                          | 4.9         | 1172                            | 256                            |
| <i>hsp</i>                                     | NE2074    | Heat-shock protein                          | 1.6         | 538                             | 346                            |
| <i>sodB</i>                                    | NE0870    | Superoxide dismutase                        | -2.9**      | 105                             | 421                            |
| <i>katA</i>                                    | NE1886    | Catalase                                    | -1.5        | 1414                            | 1756                           |
| <i>rubA</i>                                    | NE1426    | Rubredoxin                                  | 2.78**      | 965                             | 362                            |
| <i>trxA</i>                                    | NE2328    | Thioredoxin                                 | 1.75**      | 123                             | 73                             |
| <b>Nitrifier denitrification</b>               |           |                                             |             |                                 |                                |
| <i>nirK</i>                                    | NE0924    | Nitrite reductase                           | -4.2**      | 9                               | 43                             |
| <i>ncgC</i>                                    | NE0925    | Cytochrome c class I                        | -2.0        | 61                              | 156                            |
| <i>ncgB</i>                                    | NE0926    | Cytochrome c class I                        | -1.3        | 57                              | 92                             |
| <i>ncgA</i>                                    | NE0927    | Multicopper oxidase type I                  | 2.6*        | 99                              | 30                             |
| <i>nrsA</i>                                    | NE0928    | Nitrite-sensitive transcriptional repressor | 2.1**       | 656                             | 320                            |
| <i>norC</i>                                    | NE2003    | Nitric oxide reductase subunit C            | 1.5*        | 695                             | 476                            |
| <i>norB</i>                                    | NE2004    | Nitric oxide reductase subunit B            | 1.2         | 749                             | 662                            |
| <i>norQ</i>                                    | NE2005    | Nitric oxide reductase activation ATPase    | 1.2         | 1651                            | 1618                           |
| <i>norD</i>                                    | NE2006    | Nitric oxide reductase activation protein   | 1.2         | 1398                            | 1329                           |

| Gene ID            | Locus tag | Annotation                               | Fold change | Rank abundance                  |                                |
|--------------------|-----------|------------------------------------------|-------------|---------------------------------|--------------------------------|
|                    |           |                                          |             | NH <sub>3</sub> -limited growth | O <sub>2</sub> -limited growth |
| <b>Respiration</b> |           |                                          |             |                                 |                                |
| <i>senC</i>        | NE0682    | senC (sNOR associated)                   | 2.7**       | 1356                            | 631                            |
| <i>norY</i>        | NE0683    | sNOR subunit 1                           | 5.5*        | 428                             | 64                             |
| <i>norS</i>        | NE0684    | sNOR subunit 2                           | 10.8*       | 1200                            | 102                            |
| <i>coxC</i>        | NE1013    | Cyt c oxidase aa <sub>3</sub> sub 3      | 1.9**       | 27                              | 13                             |
| <i>coxA</i>        | NE1016    | Cyt c oxidase aa <sub>3</sub> sub 1      | 1.7*        | 50                              | 24                             |
| <i>coxB</i>        | NE1017    | Cyt c oxidase aa <sub>3</sub> sub 2      | 3.0*        | 60                              | 16                             |
| <i>ctaG</i>        | NE1015    | Cyt c oxidase aa <sub>3</sub> sub 4      | 1.9**       | 86                              | 45                             |
| <i>petA</i>        | NE0809    | Ubiquinol-cytochrome c reductase         | 3.0**       | 389                             | 110                            |
| <i>petB</i>        | NE0810    | Cytochrome b                             | 2.2*        | 112                             | 44                             |
| <i>petC</i>        | NE0811    | Cytochrome c                             | 1.1         | 114                             | 118                            |
| <i>nuoN</i>        | NE1764    | NADH-quinone oxidoreductase subunit N    | 1.2         | 494                             | 448                            |
| <i>nuoM</i>        | NE1765    | NADH:ubiquinone oxidoreductase subunit M | 1.2         | 659                             | 612                            |
| <i>nuoL</i>        | NE1766    | NADH:ubiquinone oxidoreductase subunit L | 1.3         | 391                             | 323                            |
| <i>nuoK</i>        | NE1767    | NADH-quinone oxidoreductase subunit K    | -1.2        | 498                             | 681                            |
| <i>nuoJ</i>        | NE1768    | NADH:ubiquinone oxidoreductase subunit J | -1.0        | 336                             | 381                            |

| Gene ID     | Locus tag | Annotation                               | Fold change | Rank abundance                  |                                |
|-------------|-----------|------------------------------------------|-------------|---------------------------------|--------------------------------|
|             |           |                                          |             | NH <sub>3</sub> -limited growth | O <sub>2</sub> -limited growth |
| <i>nuoI</i> | NE1769    | NADH-quinone oxidoreductase subunit I    | -2.8        | 131                             | 500                            |
| <i>nuoH</i> | NE1770    | NADH-quinone oxidoreductase subunit H    | -1.6**      | 119                             | 236                            |
| <i>nuoG</i> | NE1771    | NADH dehydrogenase subunit G             | -1.1        | 240                             | 288                            |
| <i>nuoF</i> | NE1772    | NADH dehydrogenase                       | 1.0         | 355                             | 379                            |
| <i>nuoE</i> | NE1773    | NADH dehydrogenase                       | 1.4**       | 485                             | 377                            |
| <i>nuoD</i> | NE1774    | NADH-quinone oxidoreductase subunit D    | 1.2*        | 321                             | 299                            |
| <i>nuoC</i> | NE1775    | NADH-quinone oxidoreductase subunit C    | -1.4        | 253                             | 424                            |
| <i>nuoB</i> | NE1776    | NADH-quinone oxidoreductase subunit B    | 1.0         | 323                             | 349                            |
| <i>nuoA</i> | NE1777    | NADH:ubiquinone oxidoreductase subunit A | 1.2         | 201                             | 173                            |
| <i>atpI</i> | NE0199    | ATP synthase unit I                      | 5.2**       | 516                             | 85                             |
| <i>atpB</i> | NE0200    | ATP synthase subunit A                   | 2.8*        | 345                             | 148                            |
| <i>atpE</i> | NE0201    | ATP synthase subunit C                   | 1.1         | 87                              | 96                             |
| <i>atpF</i> | NE0202    | ATP synthase subunit B                   | -1.2        | 244                             | 342                            |
| <i>atpH</i> | NE0203    | ATP synthase subunit delta               | 1.0         | 208                             | 221                            |
| <i>atpA</i> | NE0204    | ATP synthase subunit alpha               | -1.1        | 133                             | 158                            |
| <i>atpG</i> | NE0205    | ATP synthase subunit gamma               | 1.2         | 390                             | 343                            |
| <i>atpD</i> | NE0206    | ATP synthase subunit beta                | 1.1         | 102                             | 103                            |
| <i>atpC</i> | NE0207    | ATP synthase epsilon chain               | 1.3         | 101                             | 87                             |
